# Supplementary material
Source: publisher figshare collection journal article supplement (https://acs.figshare.com/ndownloader/files/12810020)
Supplement: Supplementary file 1 [file 12810020]

## SUPPORTING INFORMATION

### Principles and Mechanisms of Strain-Dependent Thermal Conductivity of Polycrystalline Graphene with Varying Grain Size and Surface Hydrogenation

Anran Wei <sup>a</sup>, Qihao Liu <sup>a</sup>, Haimin Yao <sup>c</sup>, Ye Li <sup>a</sup>, Yinfeng Li <sup>a,b,\*</sup>

<sup>a</sup> Department of Engineering Mechanics, School of Naval Architecture, Ocean and Civil Engineering (State Key Laboratory of Ocean Engineering), Shanghai Jiao Tong University, Shanghai 200240, China

<sup>b</sup> Collaborative Innovation Center for Advanced Ship and Deep-Sea Exploration, Shanghai 200240, China.

<sup>c</sup> Department of Mechanical Engineering, The Hong Kong Polytechnic University, Hong Kong, China

\* Corresponding author: Yinfeng Li ([liyinfeng@sjtu.edu.cn](mailto:liyinfeng@sjtu.edu.cn))

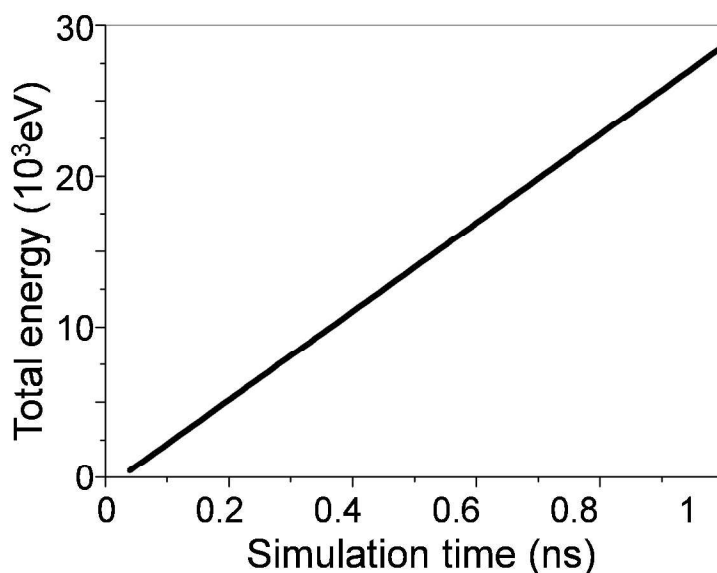

**Fig. S1.** The total energy transported across the system per unit cross-sectional area over the whole simulation process.

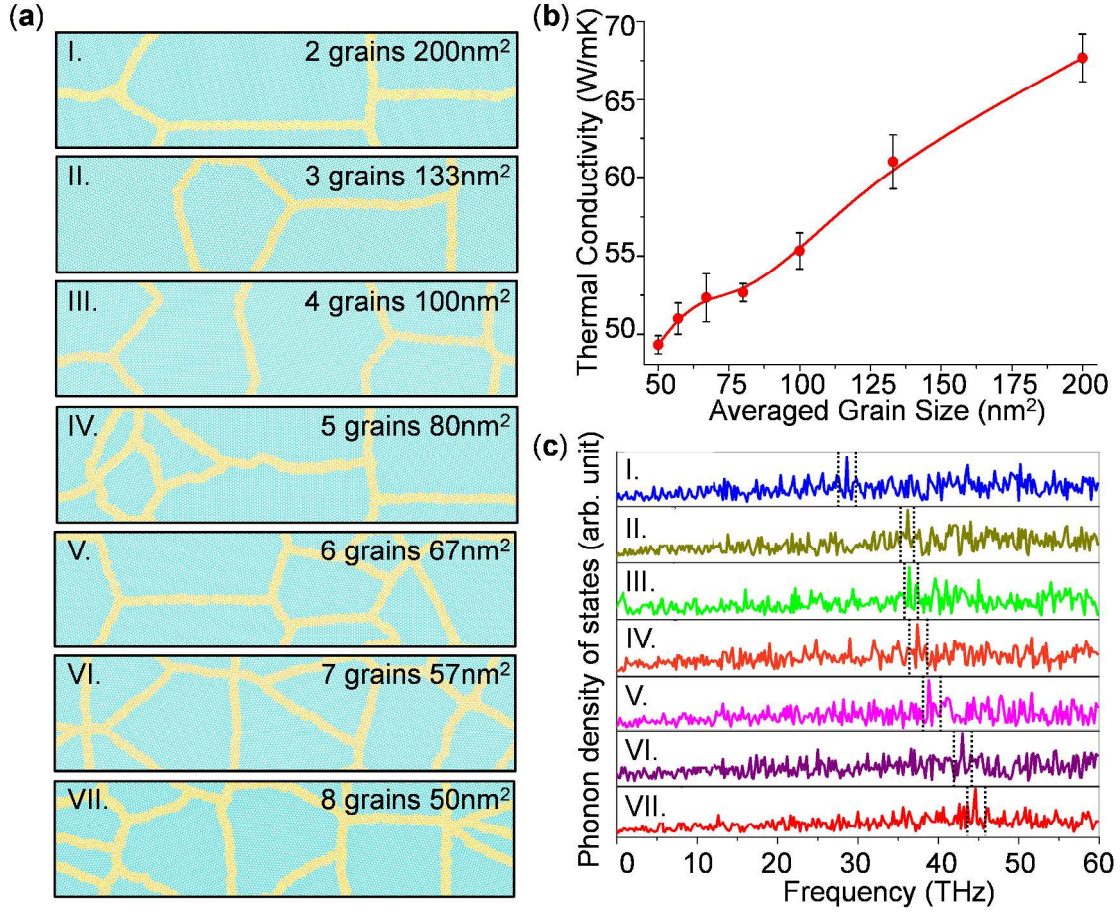

**Fig. S2. Comparisons between thermal conductivities of polycrystalline graphene with different average grain sizes.** (a) Atomistic structures of polycrystalline graphene with fixed simulation size 40 nm×10 nm and varying grain numbers ranging from 2-8, the average grain sizes are 200, 133, 100, 80, 67, 57, 50 nm<sup>2</sup>, respectively. The regions in yellow are GBs while other regions in cyan are graphene grains. (b) The evolution of thermal conductivity with average grain size. Error bar shows the fluctuation caused by the orientation and distribution of GBs. (c) Phonon density of states of the atoms in polycrystalline graphene with different average grain sizes. Dash lines mark the main peak of the calculated PDOS.

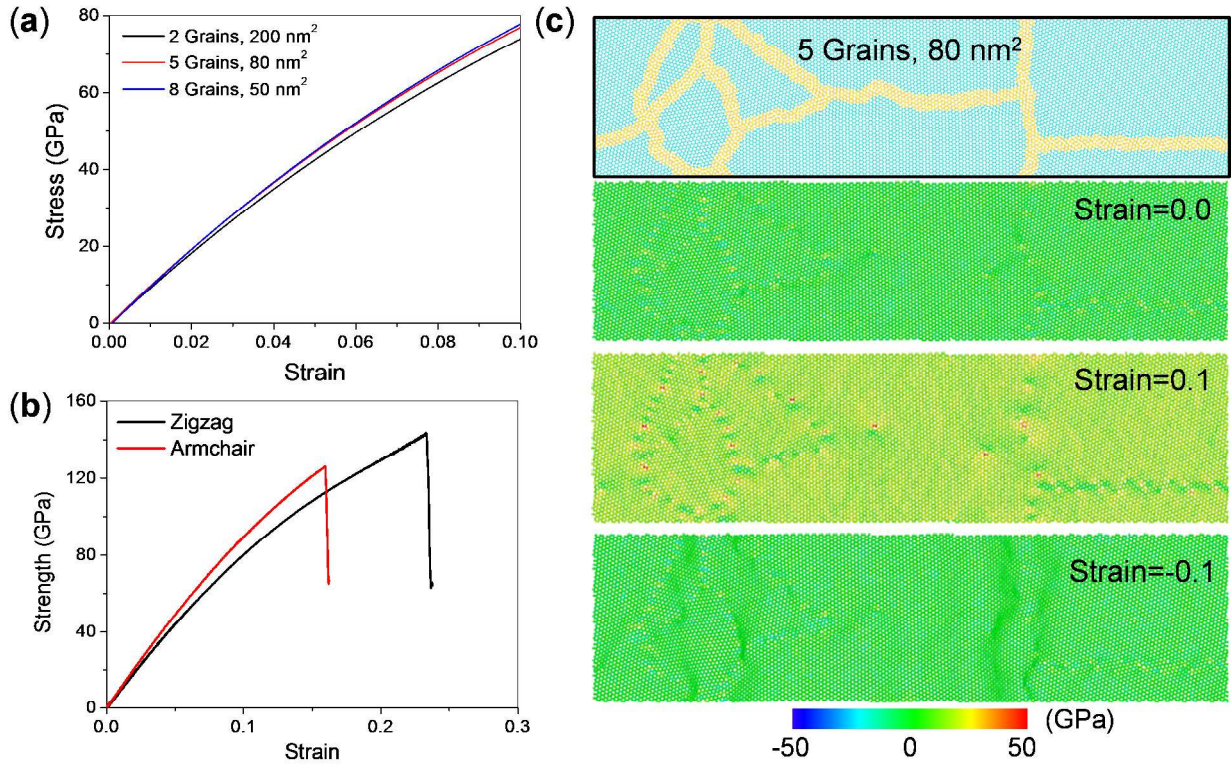

**Fig. S3. Stress in polycrystalline graphene under in-plane strain.** (a) Stress-strain curves of polycrystalline graphene with average grain size of 200, 80 and 50 nm<sup>2</sup> under tensile strain to 0.1. (b) Stress-strain curves of pristine graphene with armchair and zigzag orientations under tension till failure. (c) Comparisons between tensile stress contours for polycrystalline graphene with average grain size of 80 nm<sup>2</sup> under in-plane strain  $\epsilon = 0, 0.1, -0.1$ . The regions in yellow are GBs while other regions in cyan are graphene grains.

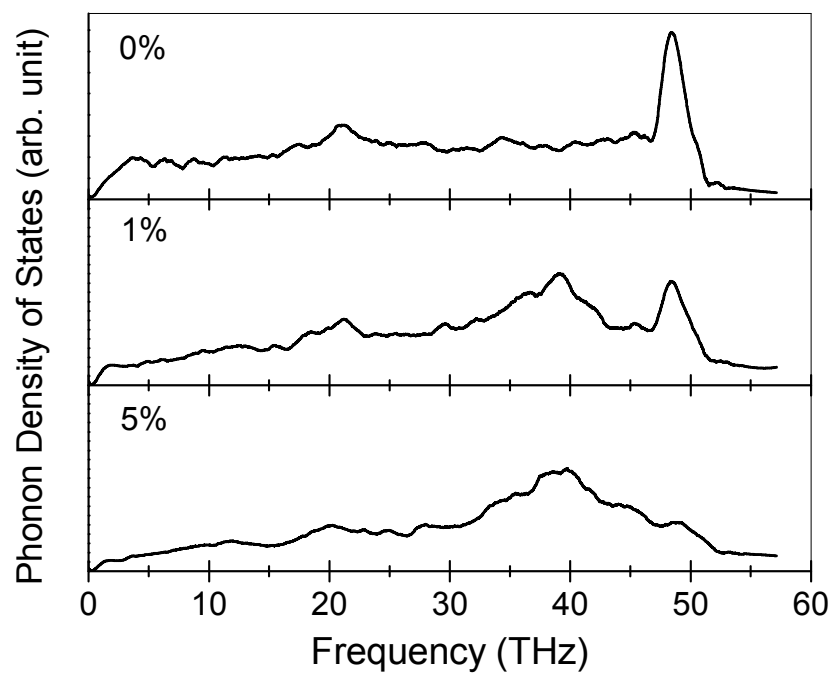

**Fig. S4. Phonon density of states of the atoms in polycrystalline graphene with varying surface hydrogenations.**
